# Supplementary material for: The emergence of Omicron VOC and its rapid spread and persistence in the Western Amazon
Source: PubMed Central journal article supplement (PMC10434903; doi:10.1371/journal.pone.0285742), 2023-08-17
Supplement: pone.0285742.s001.pdf [file pone.0285742.s001.pdf]

## SUPPLEMENTAL TABLE

### **Data Availability**

GISAID Identifier: EPI\_SET\_230107pn

doi: [10.55876/gis8.230107pn](https://doi.org/10.55876/gis8.230107pn)

All genome sequences and associated metadata in this dataset are published in GISAID's EpiCoV database. To view the contributors of each individual sequence with details such as accession number, Virus name, Collection date, Originating Lab and Submitting Lab and the list of Authors, visit [10.55876/gis8.230107pn](https://gisaid.org/230107pn)

### **Data Snapshot**

- EPI\_SET\_230107pn is composed of 363 individual genome sequences.
- The collection dates range from 2019-12-24 to 2022-12-16;
- Data were collected in 2 countries and territories;
- All sequences in this dataset are compared relative to hCoV-19/Wuhan/WIV04/2019 (WIV04), the official reference sequence employed by GISAID (EPI\_ISL\_402124). Learn more at <https://gisaid.org/WIV04>.
